# Supplementary material
Source: HighWire-hosted journal article supplement (https://bmjopenquality.bmj.com/highwire/filestream/135932/field_highwire_adjunct_files/1/ds4329.pdf)

Figure 3

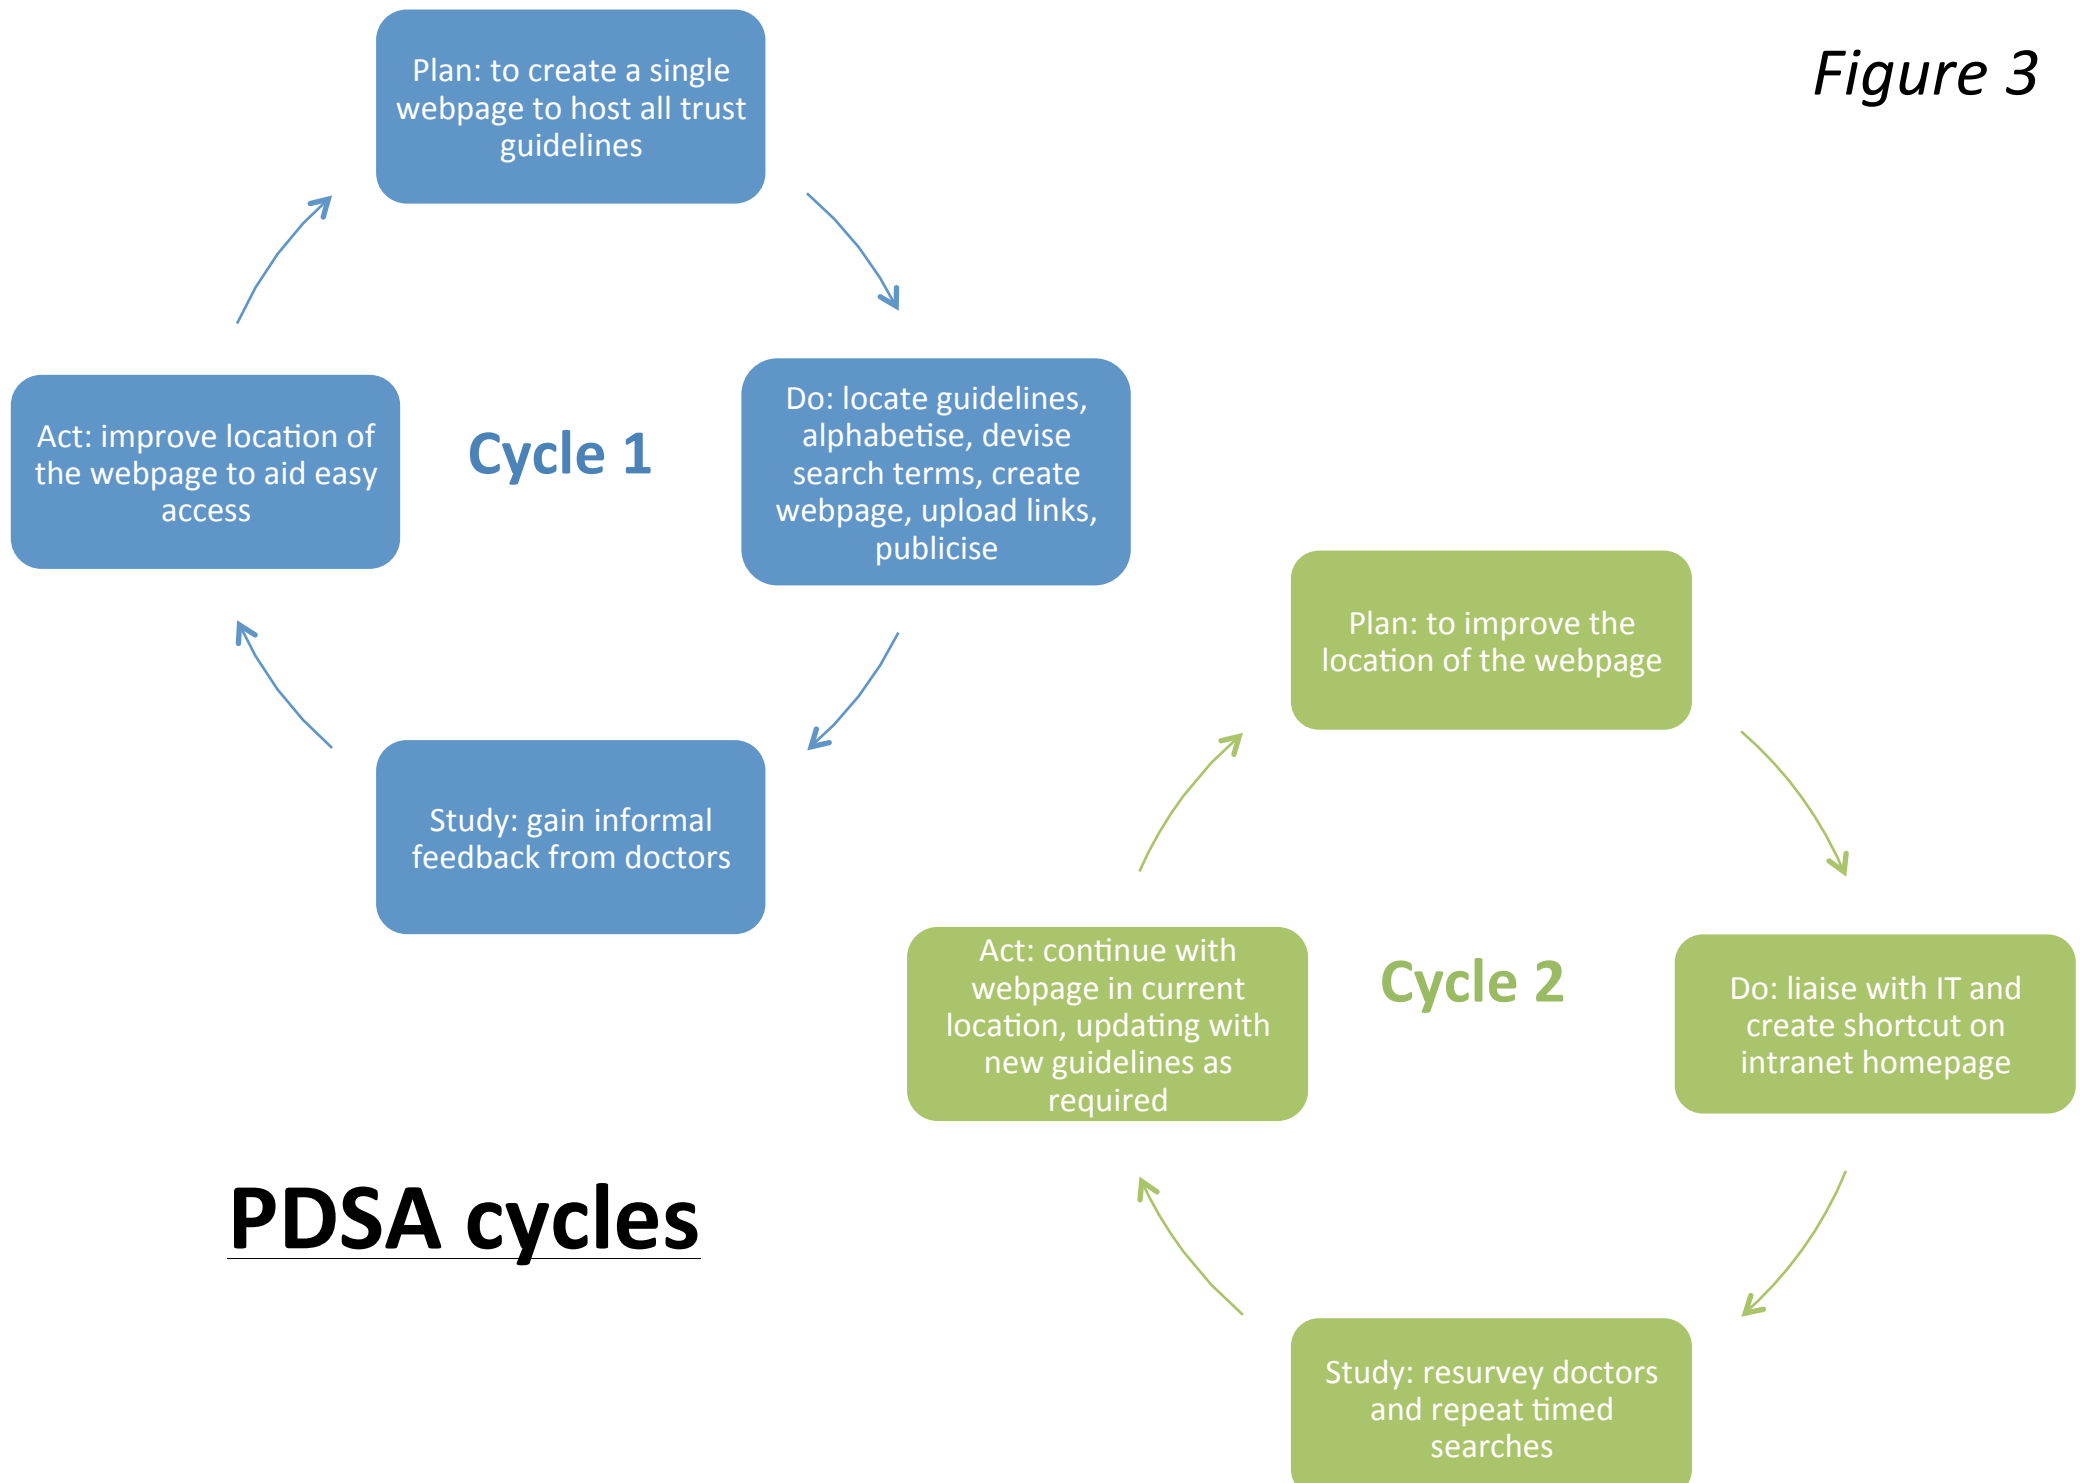

Figure 4

Guidelines and Protocols - Great Western Intranet - Windows Internet Explorer provided by GWH NHS Foundation Trust

http://gwh-intranet/unscheduled-care/emergency-department/guidelines-and-protocols.aspx

GP portal - 3Ts Formulary GWH website

Welcome Abigail Smith

A-Z A B C D E F G H I J K L M N O P Q R S T U V W X Y Z

Great Western Hospitals NHS Foundation Trust

Staff Directory | Find a GP | Google | Contact Webmaster

[Policies and Procedures](#)
[Other Documents](#)
[IT Services](#)

[Home](#)
[News](#)
[Events](#)
[Trust wide](#)
[Diagnostics & Outpatients](#)
[Planned Care](#)
[Unscheduled Care](#)
[Women's and Children's](#)
[Integrated Community Health](#)
[Staff Area](#)

## Intranet

- Welcome to New Doctors
- Teaching and Training
- Guidance
- Rotas
- Medical Students
- Clinical Documents
- Governance and Audit
- ED Patient information
- ED documents
- Mental Health Liaison
- Stroke Management
- Trauma
- Emergency Tools
- Useful Contacts
- Nursing
- Guidelines and Protocols

## Guidelines and Protocols

A to Z

A

[Acute pain assessment and management](#)  
Medicine: Analgesia; Analgesia ladder; Pain control

[Acute pain in adults on long-term opiates guidance](#)  
Opiates; pain management; morphine; analgesia

[Adult Life Support](#)  
Emergency Medicine; ALS; Resuscitation

[AKI guidance](#)  
Medicine/surgery; kidney injury; AKI; renal failure

[Alcohol withdrawal \(acute\)](#)  
Medicine: Alcohol withdrawal; Detoxification; Detox; CIWA

[Alcohol withdrawal for hospital patients guidance](#)  
Medicine/surgery; alcohol withdrawal; toxicity

[Alcohol: How to reduce your intake safely advice leaflet](#)  
Emergency department; Alcohol advice; Alcohol liaison

[Allergy action plan](#)  
Paediatrics; allergy anaphylaxis

[Anaphylaxis Management](#)

Done

Trusted sites | Protected Mode: Off

100%

08:39 29/04/2014

Figure 5

## Number of clicks: Chest Pain Protocol

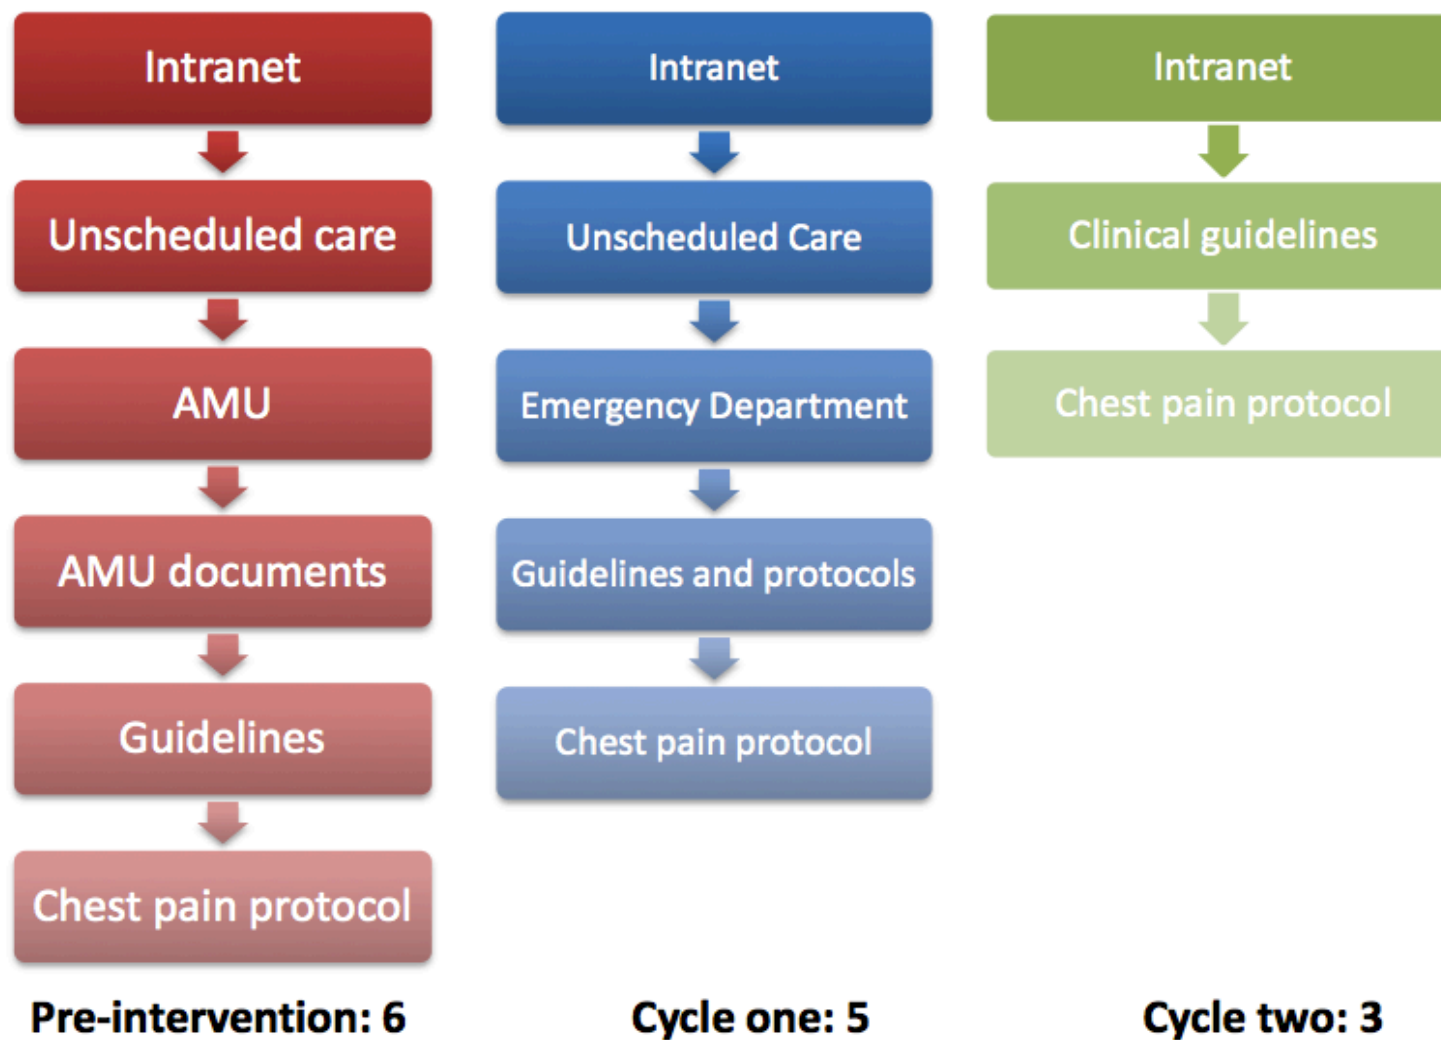

Supplement: ds4329.pdf [file ds4329.pdf]
